# Supplementary material for: Enzyme-passage free culture of mouse embryonic stem cells on thermo-responsive polymer surfaces
Source: Royal Society of Chemistry journal article supplement (doi:10.1039/c0jm03993d), 2011-01-01
Supplement: c0jm03993d.pdf [file c0jm03993d.pdf]

## Enzyme-passage free culture of mouse embryonic stem cells on thermo-responsive polymer surfaces

Sabrina Dey, Barrie Kellam, Morgan R. Alexander, Cameron Alexander, Felicity R.A.J. Rose\*

### Supporting Information

**Table S1:** PCR primer sequences and RT-PCR details

| Gene             | Cycle No. | Primer-Probe Sequence 5'-3'                               | Product Size (bp) | Annealing temp (°C) |
|------------------|-----------|-----------------------------------------------------------|-------------------|---------------------|
| <b>GAPDH</b>     | 30        | F: TGAGGCCGGTGCTGAGTATGTCTG<br>R: CCACAGTCTTCTGGGTGGCAGTG | 302               | 60                  |
| <b>Oct-4</b>     | 30        | F: AGCACGAGTGGAAAGCAACT<br>R: AGATGGTGGTCTGGCTGAAC        | 248               | 60                  |
| <b>GATA4</b>     | 30        | F: CTGGAAGACACCCCAATCTC<br>R: GTAGTGTCCCGTCCCATCTC        | 130               | 55                  |
| <b>Brachyury</b> | 30        | F: GCTGTTGGGTAGGGAGTCAA<br>R: CCCCGTTCACATATTTCCAG        | 380               | 60                  |
| <b>Nestin</b>    | 30        | F: AGGCGCTGGAACAGAGATT<br>R: TTCCAGGATCTGAGCGATCT         | 150               | 55                  |

**Table S2:** Elemental compositions for plasma polymerised allyl alcohol (ppAAI) surfaces, ppAAI 2-bromo-isobutyrate surfaces and Poly (MEO<sub>2</sub>MA-co-OEGMA) graft surfaces.

| Assignments  | Quantification (Atomic %) |                           |                                    |
|--------------|---------------------------|---------------------------|------------------------------------|
|              | ppAAI                     | ppAAI-2-bromo-isobutyrate | poly(MEO <sub>2</sub> MA-co-OEGMA) |
| <b>C1s</b>   | 85.2±0.1                  | 85.05± 1.5                | 74.8±1.2                           |
| <b>O1s</b>   | 14.8±0.3                  | 12.3±1.11                 | 18.44±0.8                          |
| <b>Si2p</b>  | -                         | 1.2±0.3                   | -                                  |
| <b>NaKLL</b> | -                         | 0.5± 0.05                 | 0.7±0.01                           |
| <b>Ca2p</b>  | -                         | -                         | 1.6±0.2                            |
| <b>Zn2p</b>  | -                         | -                         | 0.24±0.3                           |
| <b>Br3d</b>  | -                         | 0.7± 0.08                 | 0.21±0.03                          |
| <b>Mg1s</b>  | -                         | -                         | 4.01 ± 0.04                        |

**Table S3:** XPS C1s core level curve fit results for Poly (MEO<sub>2</sub>MA-co-OEGMA) graft surfaces.

| Assignments                                            | Binding energy/eV | Quantification (atomic %) | Notes                     |
|--------------------------------------------------------|-------------------|---------------------------|---------------------------|
| <b>C -C/C-H</b>                                        | 285.021           | 77.4±0.7                  | Polymethacrylate backbone |
| <b>O-C(=O)-<u>C</u>-CH<sub>3</sub>-secondary shift</b> | 285.721           | 2.9±0.09                  | End group of poly(OEGMA)  |
| <b>C-O</b>                                             | 286.659           | 13.4±0.46                 |                           |
| <b>O-C-O/C=O</b>                                       | 287.835           | 3.4±0.1                   |                           |
| <b><u>C</u>(=O)OCH<sub>2</sub></b>                     | 289.221           | 2.9±0.08                  |                           |

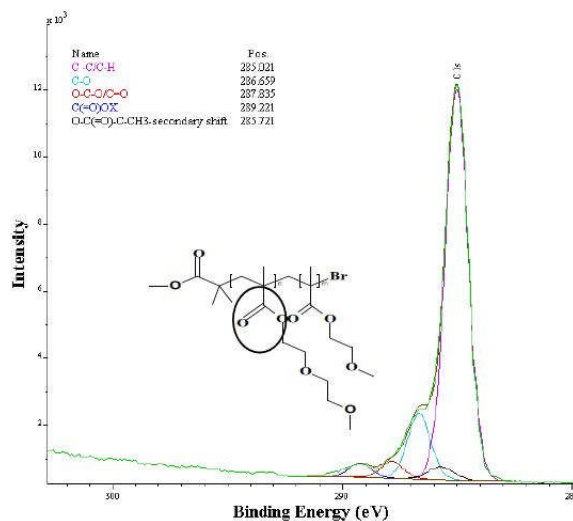

**Figure S1:** C1s core level spectra recorded after growth from the surface of poly(MEO<sub>2</sub>MA-co-OEGMA) brushes via ATRP. Component peaks from the poly(methacrylate) backbone include C-C/C-H and C(=O)OX and the end group of poly(OEGMA).

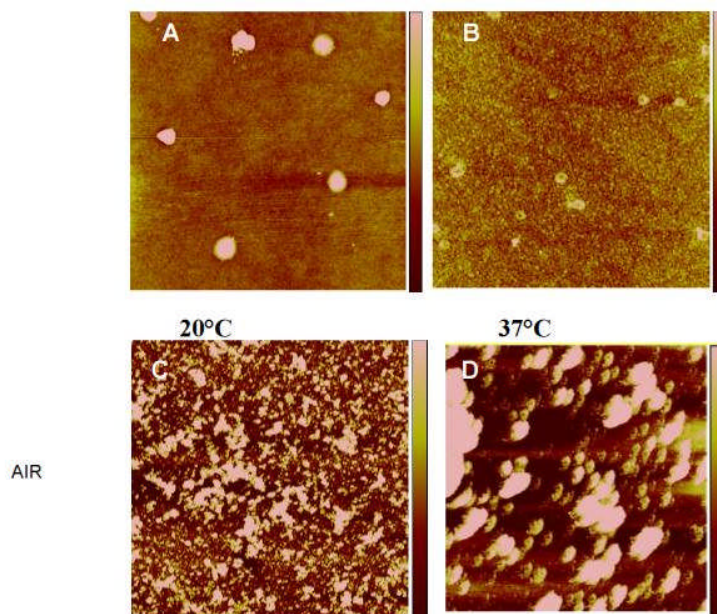

**Figure S2:** (A) Plasma polymerised allyl alcohol (ppAAI). (B) bromo-isobutyryl bromide imaged using AFM in air. Representative AFM images of poly (MEO<sub>2</sub>MA-co-OEGMA) grafted surface below (20°C) (C) and above (37°C) (D) the LCST in air (scan size: 5\*5 μm<sup>2</sup>, z-range: 10 nm).

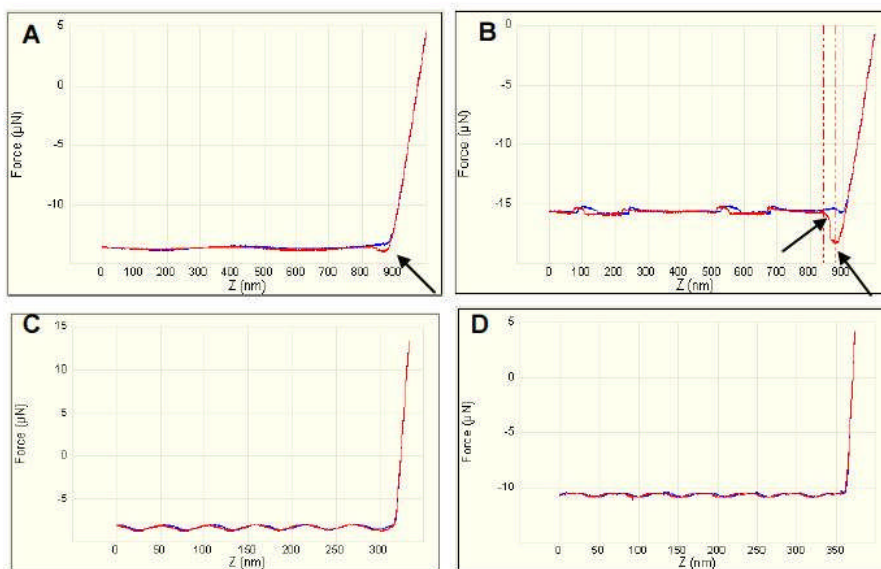

**Figure S3:** Representative force distance curves obtained for ozone cleaned Si<sub>3</sub>N<sub>4</sub> AFM tip at poly (MEO<sub>2</sub>MA-co-OEGMA) surfaces. At 20°C (A) low adhesion between tip and surface indicated by small pull-off trace (arrowed) in contrast to the higher pull-off force observed at 37°C. (B) PEOGMA control surfaces showed no adhesion between the AFM tip and the polymer layer as it has an LCST of 90°C, below (C) and above 37°C (D).

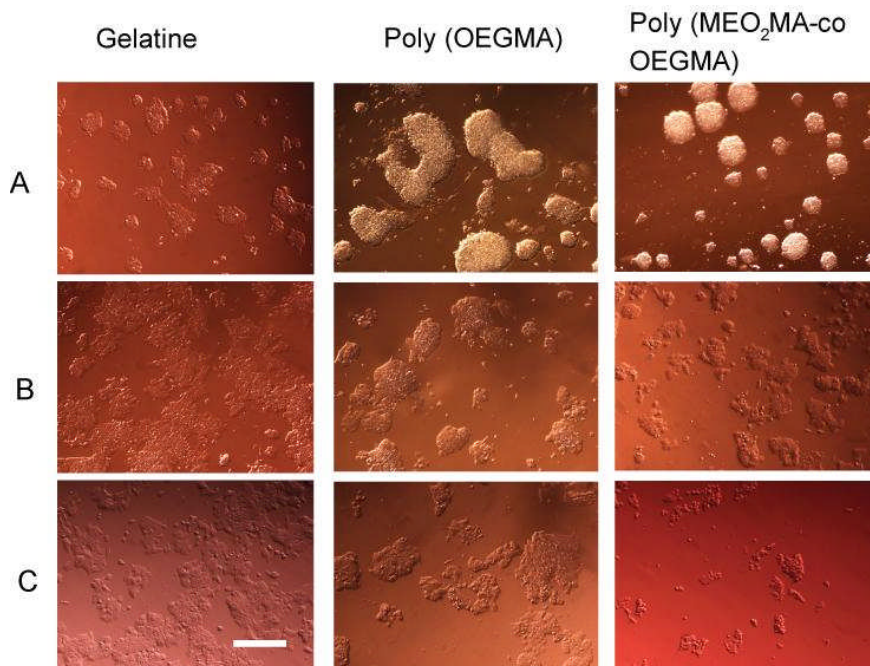

**Figure S4:** Feeder free mES cells attachment studies to Gelatine, poly(OEGMA) and poly(MEO<sub>2</sub>MA-co-OEGMA). (A) Low attachment of mESCs to synthetic polymer surfaces and formation of embryoid bodies compared to gelatine (positive control). (B) mES cell attachment to poly(OEGMA) and poly(MEO<sub>2</sub>MA-co-OEGMA) after treatment with fibronectin compared to gelatine. (C) Low detachment of cells from gelatine, partial retention of cells on poly(OEGMA) but reduced cell attachment to poly(MEO<sub>2</sub>MA-co-OEGMA). Scale bar = 100µm.

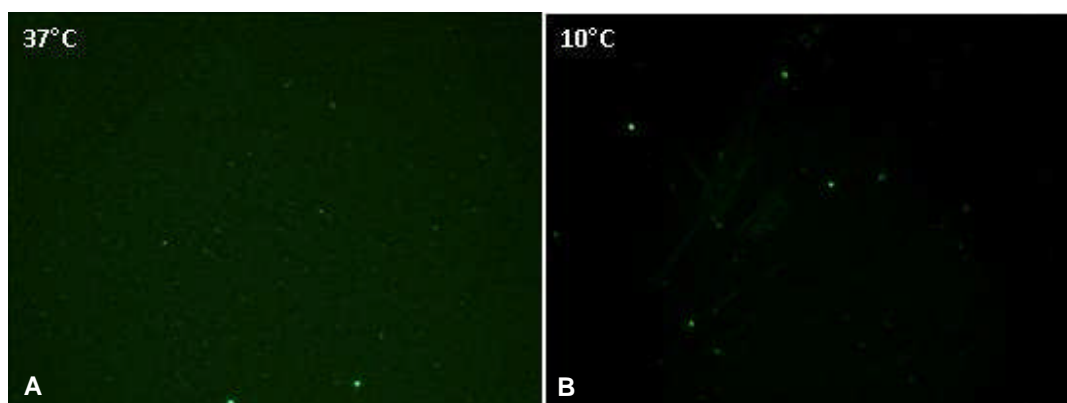

**Figure S5:** Representative fluorescence images of surfaces immuno-stained with fluorescent antibodies to fibronectin after incubation of fibronectin with poly(MEO<sub>2</sub>MA-co-OEGMA) at 37°C overnight (A) and after detachment of cells at 10°C (B).

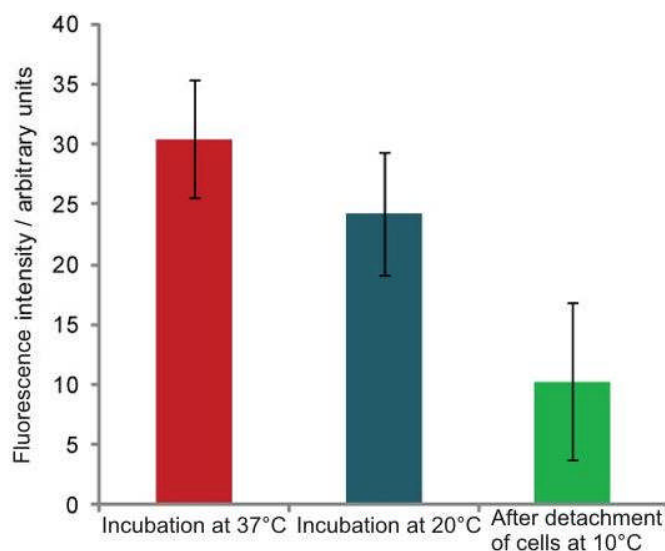

**Figure S6:** Averaged fluorescence intensities of poly(MEO<sub>2</sub>MA-co-OEGMA) surfaces following incubation with fibronectin, washing and then immunostaining with a FITC-anti fibronectin antibody. Error bars represent SD and n=3

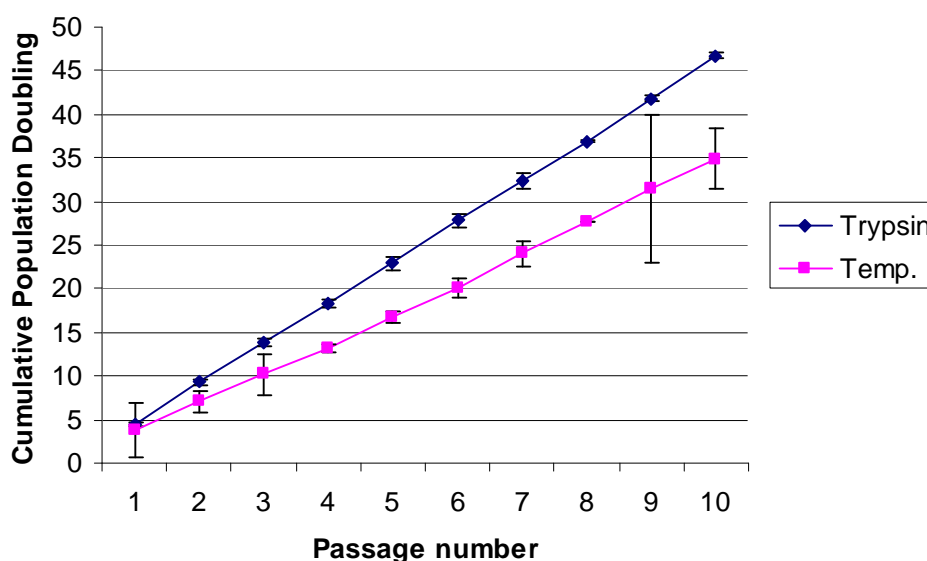

**Figure S7:** Growth curve of mESCs which were serially passaged using trypsin (◆) and temperature (◻) from gelatine coated TCPS (control) or the poly (MEO<sub>2</sub>MA-co-OEGMA)/fibronectin thermoresponsive polymer surface respectively over 10 passage cycles (error bars indicate SD; n = 9, three individual samples in a total of three separate experiments)
